# Supplementary material for: Farming systems in sheep rearing: Impact on growth and reproductive performance, nutrient digestibility, disease incidence and heat stress indices
Source: PLOS journal article supplement (doi:10.1371/journal.pone.0244922), 2021-01-13
Supplement: S2 (10.1371/journal.pone.0244922.s002) [file journal.pone.0244922.s002]

**Supplementary File 2** Description of panting score

| Score | Breathing pattern       | Description of panting                                                                |
|-------|-------------------------|---------------------------------------------------------------------------------------|
| 0     | 60 or fewer breaths/min | Normal respiration                                                                    |
| 1     | 60-90 breaths/min       | Slightly elevated respiration                                                         |
| 2     | 90-120 breaths/min      | Moderate panting and/or the presence of drool or a small amount of saliva,            |
| 3     | 120-150 breaths/min     | Heavy open-mouthed panting; saliva usually present                                    |
| 4     | >150 breaths/min        | Severe open-mouthed panting accompanied by protruding tongue and excessive salivation |
