# Supplementary material for: Farming systems in sheep rearing: Impact on growth and reproductive performance, nutrient digestibility, disease incidence and heat stress indices
Source: PLOS journal article supplement (doi:10.1371/journal.pone.0244922), 2021-01-13
Supplement: S3 (10.1371/journal.pone.0244922.s003) [file journal.pone.0244922.s003]

Supplementary file 3. Symptoms for diagnosing the diseases of sheep reared under different farming systems

| S.No. | Disease            | Symptom                                                                                      |
|-------|--------------------|----------------------------------------------------------------------------------------------|
| 1     | Diarrhea           | Runny watery/blood stained faeces                                                            |
| 2     | Bloat              | Distended abdomen, breathing difficulty, and kicking at the abdomen region                   |
| 3     | Pneumonia          | Depression, lethargy, inappetance, sneezing, and coughing.                                   |
| 4     | Anorexia           | Lack of appetite                                                                             |
| 5     | Pregnancy toxaemia | History of advanced pregnancy. Drowsy, comatose, tremors, blindness, and inappetance         |
| 6     | Abscess            | Swollen, pus-filled lump under the surface of the skin                                       |
| 7     | Foot rot           | Limping, lameness, raw infection of the skin between the toes. Slimy and Foul smelling toes. |
| 8     | Tick infestation   | Anemia and incidence of ticks on the skin surface                                            |
